# Supplementary material for: Degenerative Cervical Myelopathy: Insights into Its Pathobiology and Molecular Mechanisms
Source: PubMed Central journal article supplement (PMC8001572; doi:10.3390/jcm10061214), 2021-03-15
Supplement: jcm-10-01214-s001.pdf [file jcm-10-01214-s001.pdf]

## Supplementary file

**Table S1. Normal range of motion of the cervical spine.** One of the first findings in DCM conditions is a limited range of motion, often due to pain and this finding can appear even before any radiologic changes. The decrease in range of motion is often subtle at first and a significant limitation is usually present before the patient seeks medical attention for this cause [14].

| <b>Movement</b> | <b>Average (normal) range of motion</b> | <b>Main joint(s) involved</b>                |
|-----------------|-----------------------------------------|----------------------------------------------|
| Flexion         | 90°                                     | C0-C1 (10 °), Sub-axial cervical spine (60°) |
| Extension       | 70°                                     | C0-C1 (21°), Sub-axial cervical spine (40°)  |
| Lateral Bending | 20-45°                                  | Sub-axial cervical spine (10-35°)            |
| Axial Rotation  | 90° each side                           | C1-C2 (40°)                                  |
